# Supplementary material for: Transformer-Based Generative Model Accelerating the Development of Novel BRAF Inhibitors
Source: PubMed Central journal article supplement — ACS Omega. 2021 Dec 1;6(49):33864–73. doi: 10.1021/acsomega.1c05145 (PMC8674994; doi:10.1021/acsomega.1c05145), 2021-12-01
Supplement: ao1c05145_si_001.pdf [file ao1c05145_si_001.pdf]

# **Transformer-based generative model accelerating the development of novel BRAF inhibitors**

Lijuan Yang<sup>1,2,3,4</sup>, Guanghui Yang<sup>1,4</sup>, Zhitong Bing<sup>1,4</sup>, Yuan Tian<sup>5,1</sup>, Yuzhen Niu<sup>6\*</sup>, Liang Huang<sup>2</sup> and Lei Yang<sup>1,4\*</sup>

1. Institute of modern physics, Chinese Academy of Science, Lanzhou 730000, China
2. School of Physics and Technology, Lanzhou University, Lanzhou 730000, China
3. School of Physics, University of Chinese Academy of Science, Beijing 100049, China
4. Advanced Energy Science and Technology Guangdong Laboratory, Huizhou 516000, China
5. School of Information Science and Engineering, Lanzhou University, Lanzhou 730000, China
6. Shandong Provincial Research Center for Bioinformatic Engineering and Technique, School of Life Sciences, Shandong University of Technology, Zibo 255000, China

---

\* Corresponding to: Yuzhen Niu, Email address: niuyzh12@lzu.edu.cn

\* Corresponding to: Lei Yang, Email address: lyang\_imp@outlook.com

**Table S1:** Experimental results of the percentage of small molecules generated when GRUs of different layers are stacked.

|           | No. of layers =1 | No. of layers =2 | No. of layers =4 |
|-----------|------------------|------------------|------------------|
| Invalid   | 4.368%±0.361%    | 4.104%±0.264%    | 4.270%±0.245%    |
| Redundant | 0.038%±0.015%    | 0.034%±0.009%    | 0.038%±0.024%    |
| Retained  | 95.594%±0.351%   | 95.862%±0.268%   | 95.692%±0.241%   |

**Table S2:** Test results of the predictive model on the PDBbind dataset.

|       | Number of samples | RMSE  | R    |
|-------|-------------------|-------|------|
| Train | 10680             | 1.034 | 0.85 |
| Test  | 1186              | 1.463 | 0.68 |

**Table S3:** The percentage changes of molecules generated during reinforcement learning.

|           | Aver reward=10.0 |                | Aver reward=14.0 |                | Aver reward=15.0 |                |
|-----------|------------------|----------------|------------------|----------------|------------------|----------------|
|           | Transformer      | GRU            | Transformer      | GRU            | Transformer      | GRU            |
| Invalid   | 1.080%±0.141%    | 3.508%±0.160%  | 1.483%±0.145%    | 2.772%±0.104%  | 1.170%±0.052%    | 2.690%±0.167%  |
| Redundant | 14.473%±0.202%   | 9.584%±0.262%  | 19.247%±0.720%   | 20.626%±0.430% | 30.273%±0.525%   | 33.828%±0.616% |
| Retained  | 84.447%±0.097%   | 86.877%±0.502% | 79.270%±0.740%   | 76.427%±0.429% | 68.557%±0.552%   | 63.482%±0.456% |

**Table S4:** Details of the architecture and hyperparameters used for training the generative and predictive models.

| Hyperparameter         | Generative model        |                 | Transfer learning       |                 | Reinforcement learning  |                 | Predictive model |
|------------------------|-------------------------|-----------------|-------------------------|-----------------|-------------------------|-----------------|------------------|
|                        | Transformer-based model | GRU-based model | Transformer-based model | GRU-based model | Transformer-based model | GRU-based model |                  |
| Type of neural network | Transformer             | RNN             | Transformer             | RNN             | Transformer             | RNN             | RNN              |
| No. of layers          | 12                      | 1               | 12                      | 1               | 12                      | 1               | 3                |
| Hidden size            | 768                     | 1500            | 768                     | 1500            | 768                     | 1500            | 256              |
| Stacked memory         | --                      | 1500            | --                      | 1500            | --                      | 1500            | --               |
| Activation function    | GELU                    | TanH            | GELU                    | TanH            | GELU                    | TanH            | ReLU             |
| Optimizer              | AdamW                   | Adam            | AdamW                   | Adam            | AdamW                   | Adam            | Adam             |

| Loss function            | Cross Entropy Loss | MSELoss          |
|--------------------------|--------------------|--------------------|--------------------|--------------------|--------------------|--------------------|------------------|
| Initial learning rate    | 0.00015            | 0.0005             | 0.00015            | 0.0005             | 0.00015            | 0.0005             | 0.001            |
| Batch size               | 48                 | 128                | 48                 | 128                | 50                 | 50                 | 48               |
| Gradient clipping        | Yes                | Yes                | Yes                | Yes                | Yes                | Yes                | Yes              |
| No. of epochs            | 500                | 500                | 100                | 100                | 60                 | 150                | 150              |
| GPU details              | 1 Tesla A100 GPU   | 1 Tesla A100 GPU |
| Implementation framework | PyTorch            | PyTorch            | PyTorch            | PyTorch            | PyTorch            | PyTorch            | PyTorch          |

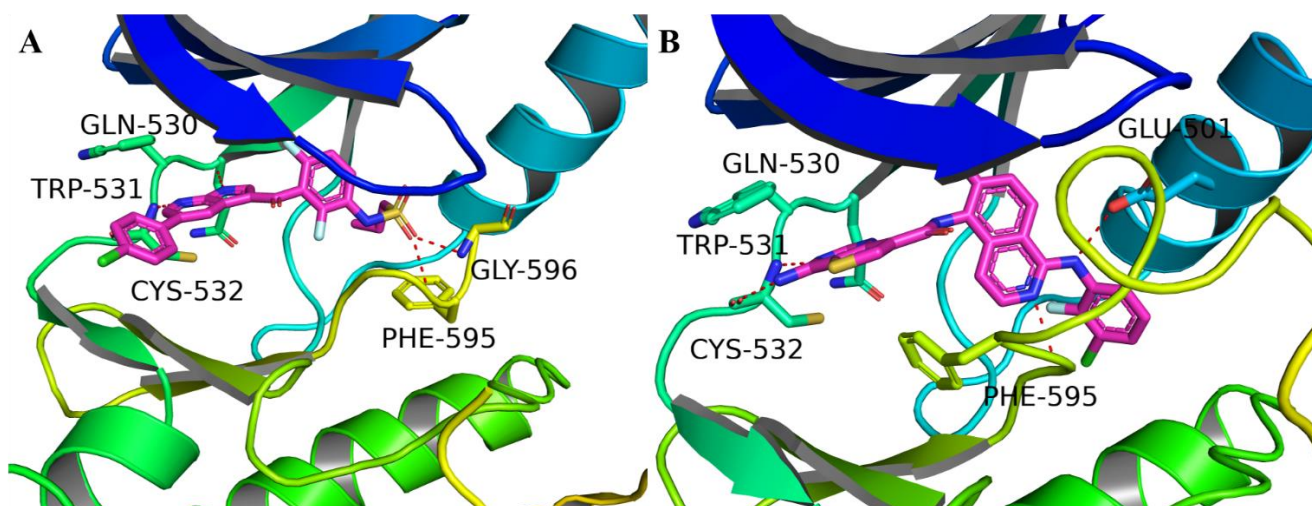

**Figure S1.** Two binding pockets of BRAF. A. the ATP binding pocket; B. the allosteric binding pocket.
